# Supplementary material for: Factors associated with the achievement of biological disease-modifying antirheumatic drug-free remission in rheumatoid arthritis: the ANSWER cohort study
Source: Springer Nature journal article supplement (doi:10.1186/s13075-018-1673-1), 2018-08-03

# Supplementary Figure 1

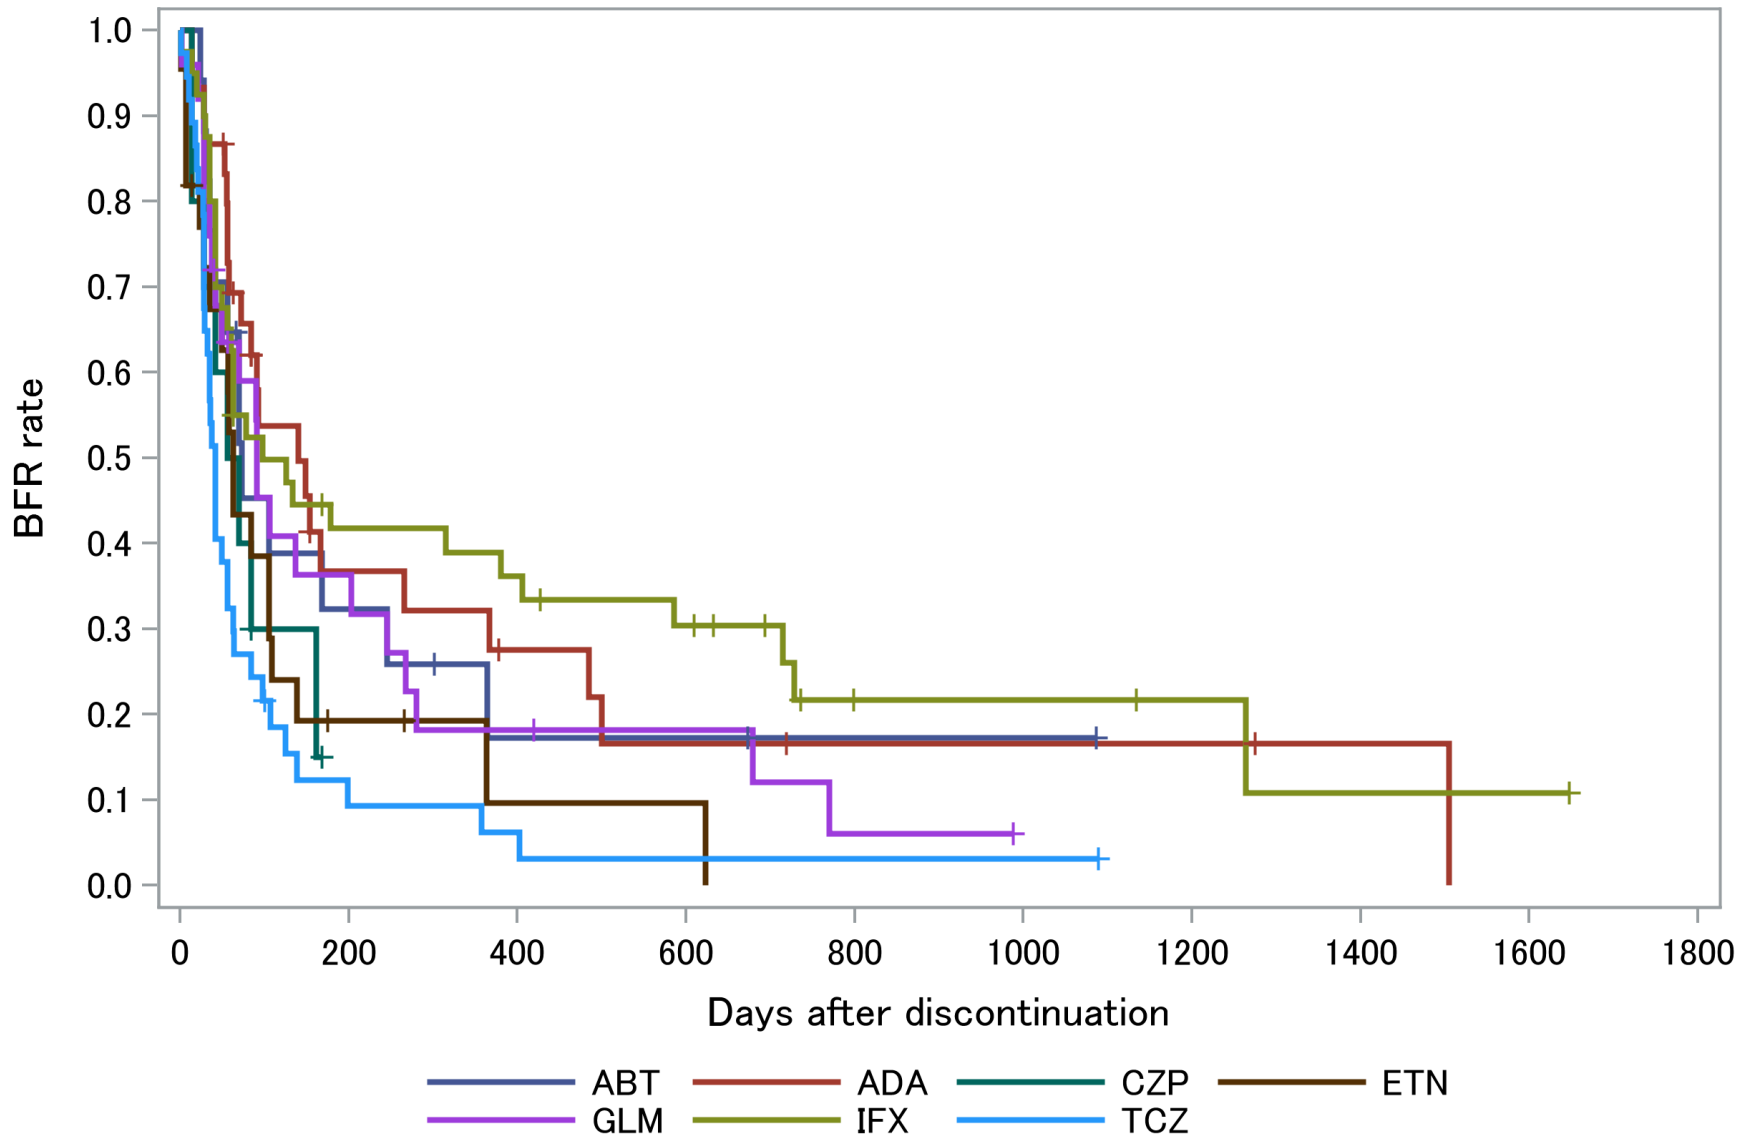

Supplement: MOESM1 [file 16000460]
